# Supplementary material for: A NIR BODIPY dye bearing 3,4,4a-trihydroxanthene moieties
Source: Royal Society of Chemistry journal article supplement (doi:10.1039/c2ob26218e), 2012-01-01

*Electronic Supplementary Information (ESI)*

**A NIR BODIPY dye bearing 3,4,4a-trihydroxanthenes moieties**

**Xin-Dong Jiang,<sup>\*a</sup> Ruina Gao,<sup>a</sup> Yi Yue,<sup>a</sup> Guo-Tao Sun<sup>c</sup> and Weili Zhao<sup>\*a,b</sup>**

*<sup>a</sup>The Key Laboratory for Special Functional Materials, Ministry of Education, Henan University, Kaifeng, Henan 475-004, China, Tel./fax: +86 0378 3881358, E-mail: xdjiang@henu.edu.cn; zhaow@henu.edu.cn*

*<sup>b</sup>School of Pharmacy, Fudan University, Shanghai, 201203, China*

*<sup>c</sup>Department of Biochemistry and Molecular Biology, Institute of Molecular Medicine, Medical School, Henan University, Kaifeng, Henan 475-004, China*

- |                                                |   |
|------------------------------------------------|---|
| 1. <sup>1</sup> H, <sup>13</sup> C NMR spectra | 2 |
| 2. HRMS-MALDI spectra of <b>1</b> and <b>2</b> | 5 |

## 1. $^1\text{H}$ , $^{13}\text{C}$ NMR spectra

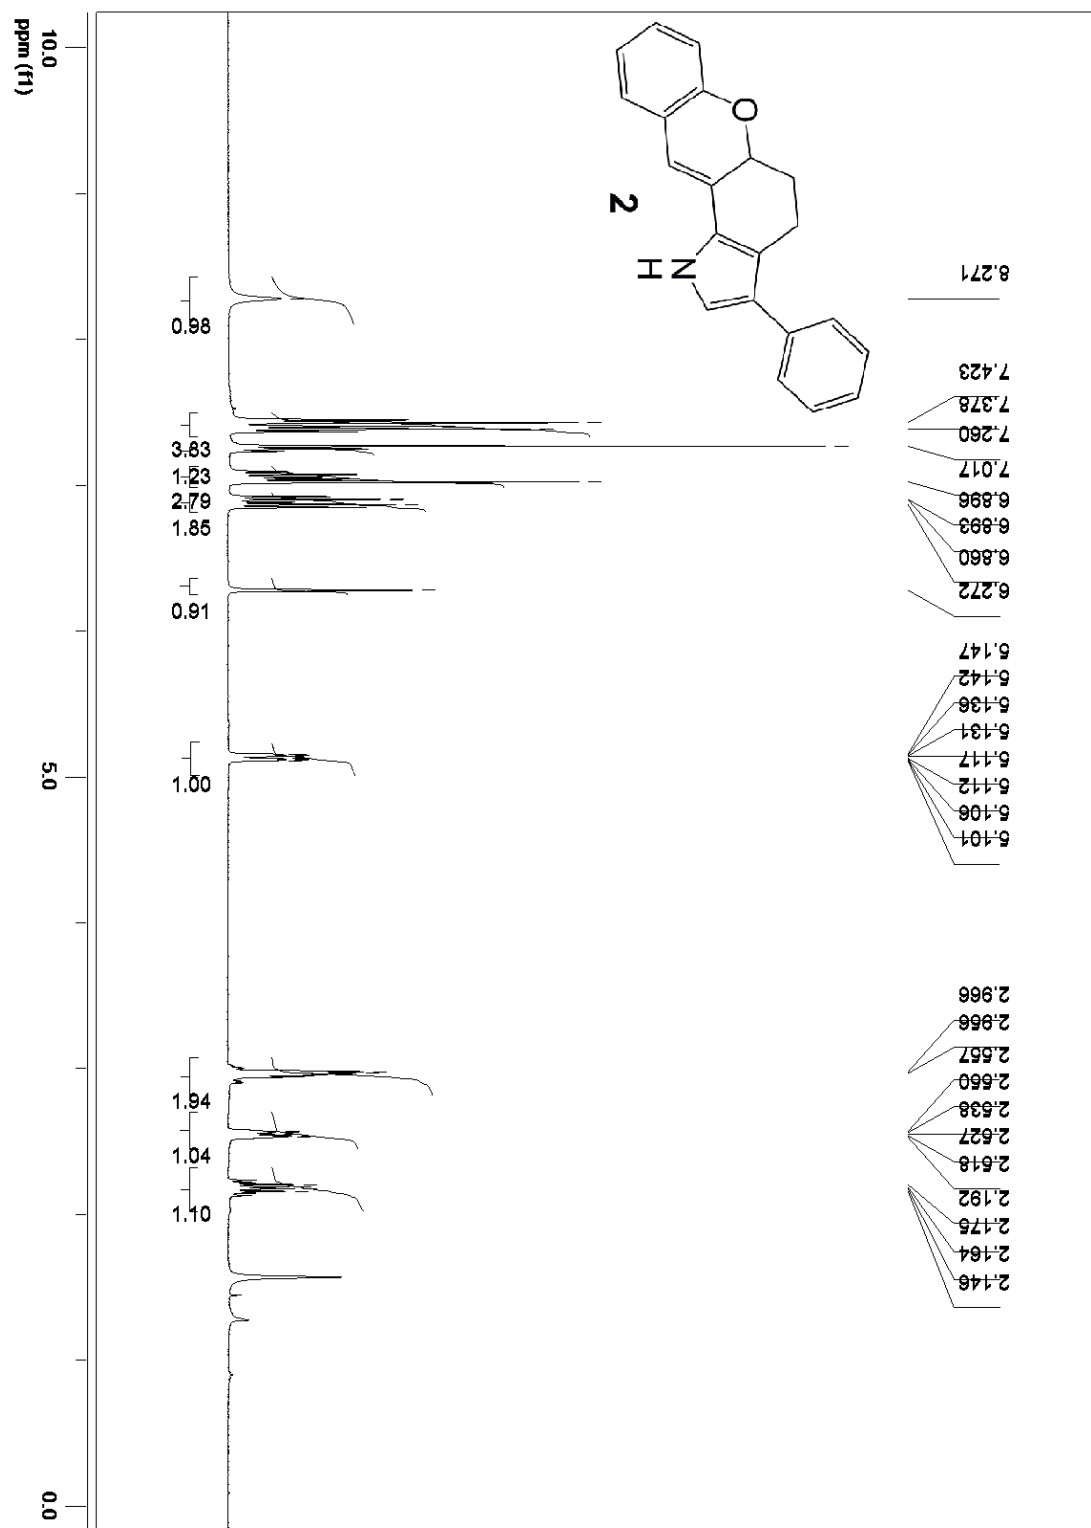

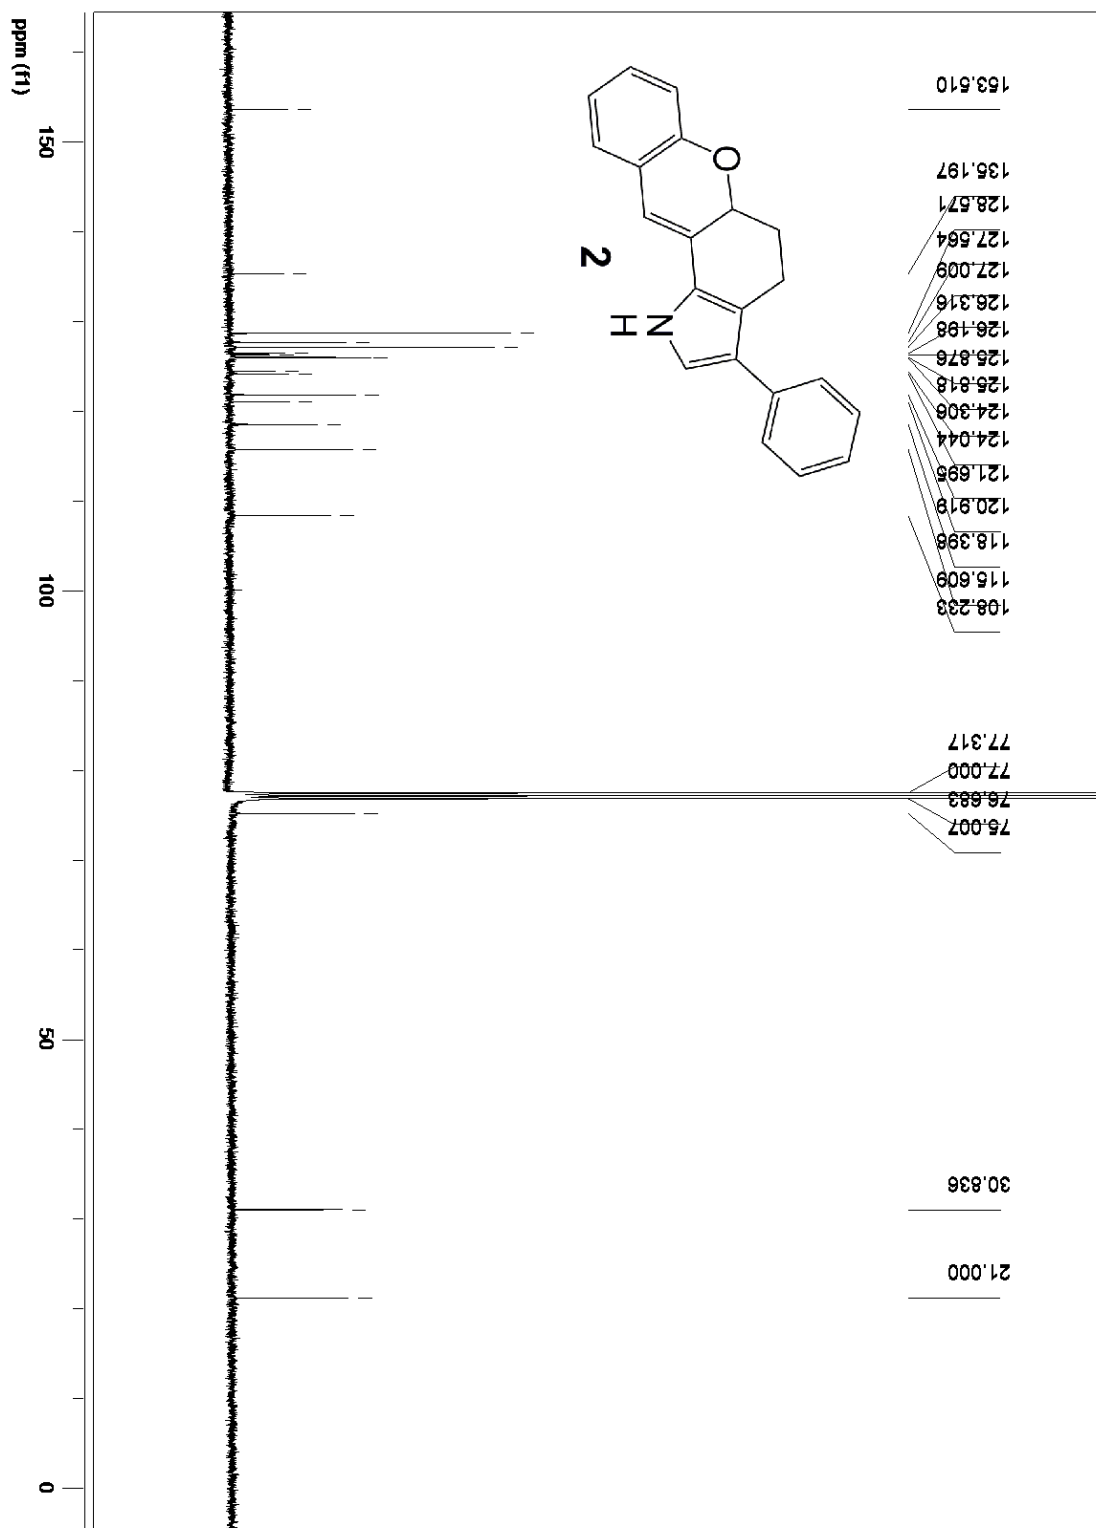

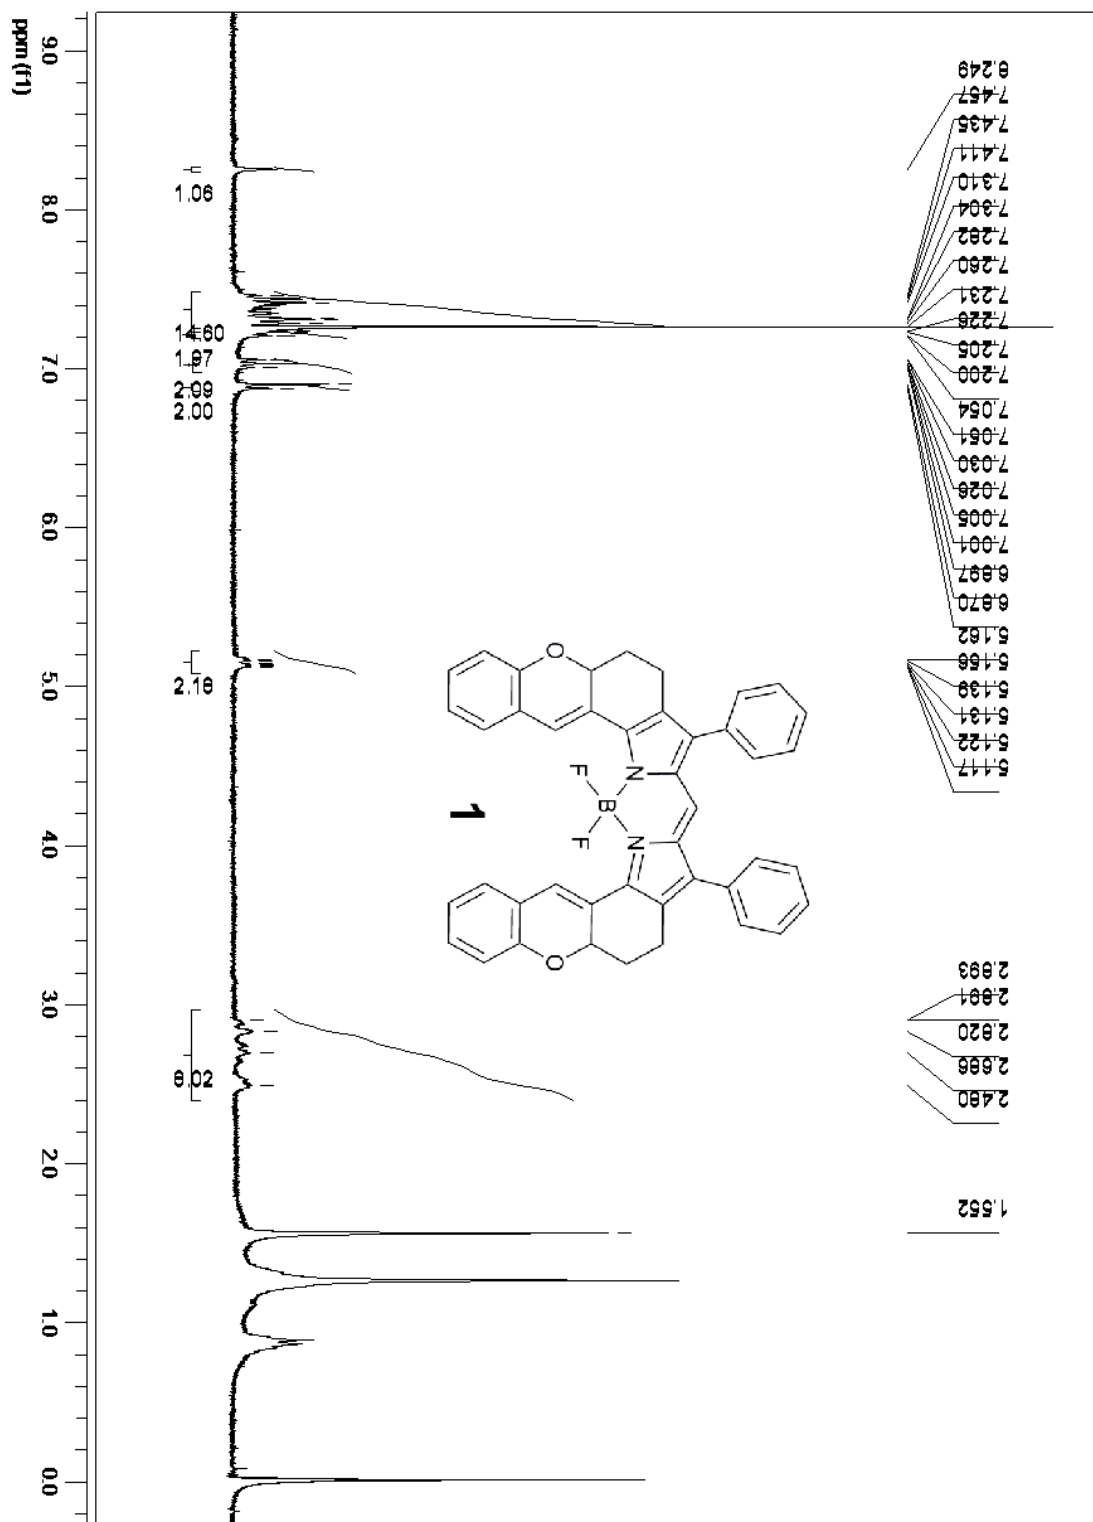

## 2. HRMS-MALDI spectra of 1 and 2

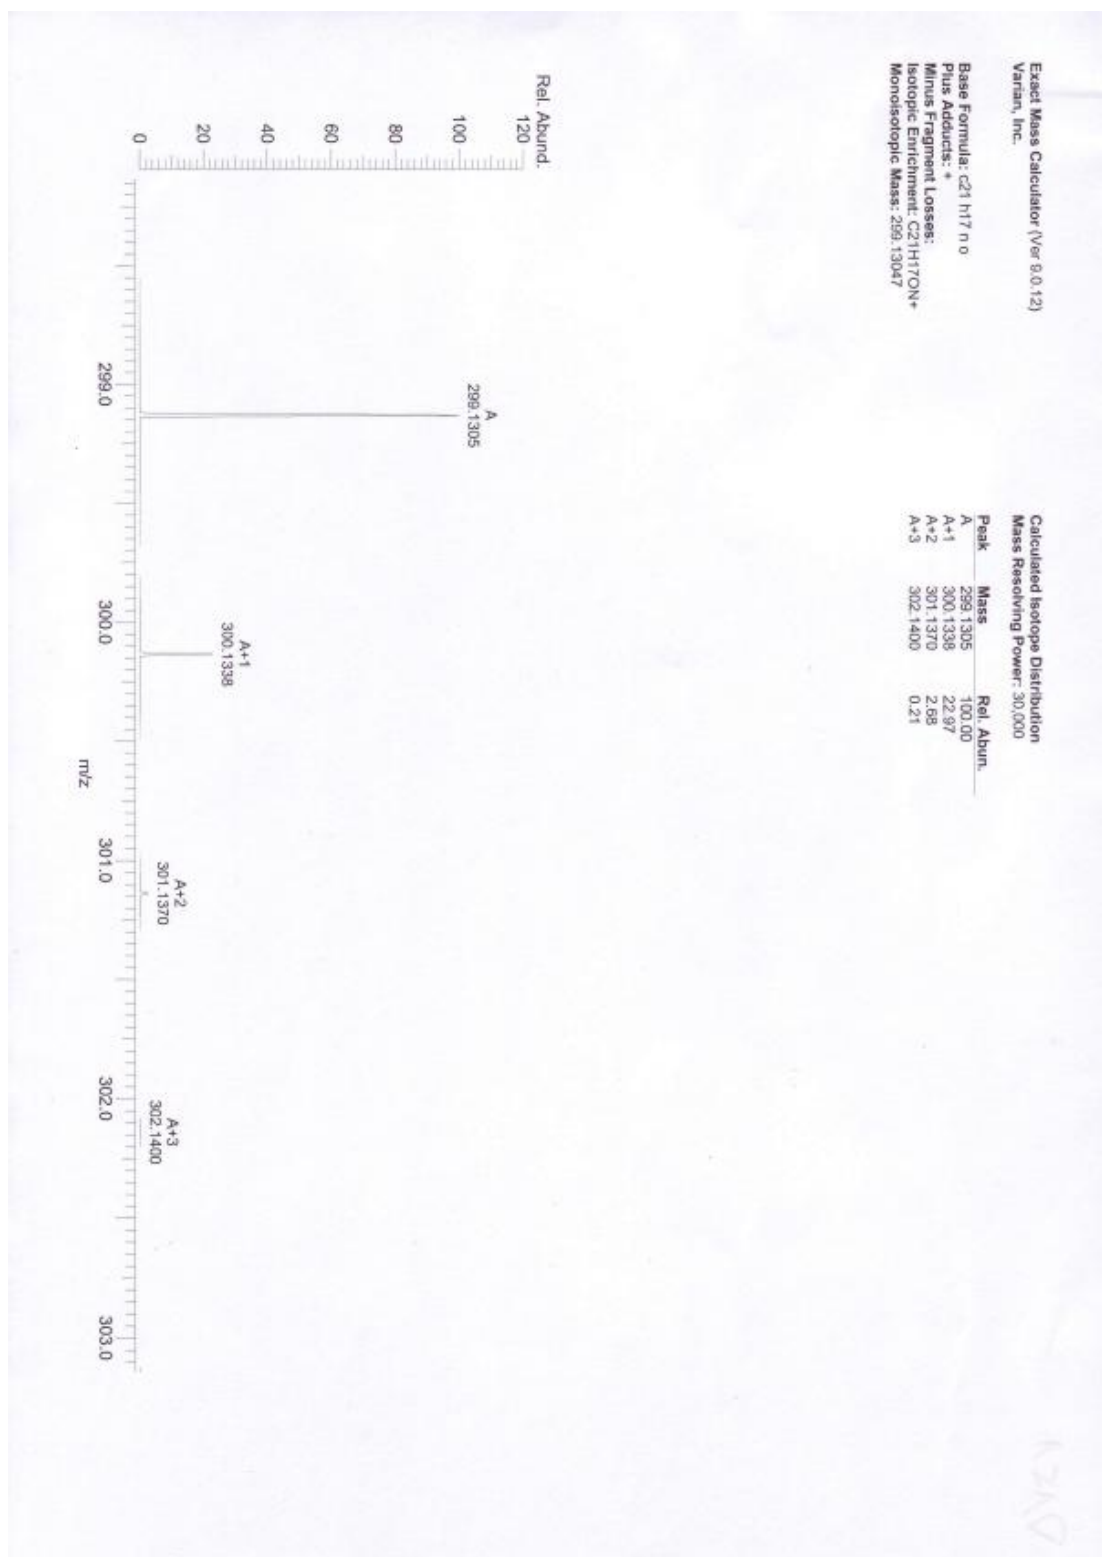

HRMS (MALDI) of 2

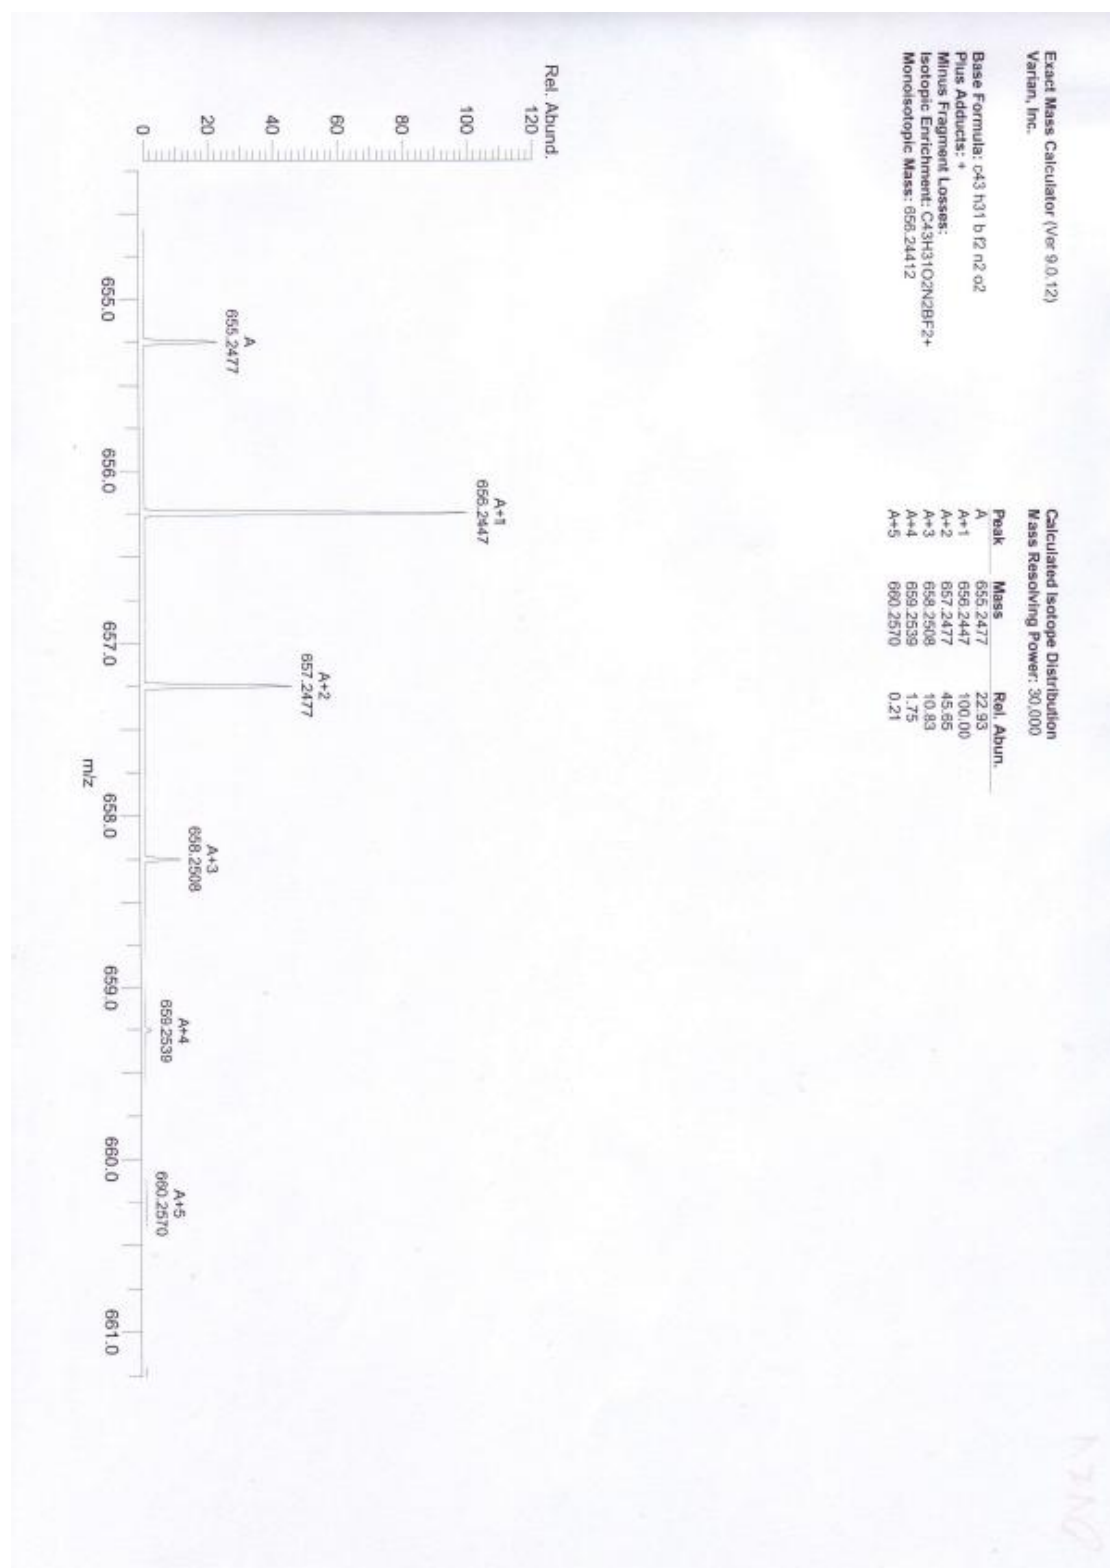

Supplement: c2ob26218e.pdf [file c2ob26218e.pdf]
